# Supplementary material for: Mesoporous Aerogel Microparticles Injected into the Abdominal Cavity of Mice Accumulate in Parathymic Lymph Nodes
Source: MDPI journal article supplement (doi:10.3390/ijms22189756), 2021-09-09
Supplement: s1 [file s1]

***Supporting Information***  
***for***  
**Mesoporous Aerogel Microparticles Injected into the Abdominal  
Cavity of Mice Accumulate in Parathymic Lymph Nodes**

Gábor Király<sup>a</sup>, John Chinonso Egu<sup>b</sup>, Zoltán Hargitai<sup>c</sup>, Ilona Kovács<sup>c</sup>,  
István Fábián<sup>b</sup>, József Kalmár<sup>b,\*</sup>, Gábor Nagy<sup>a</sup>

<sup>a</sup> Department of Molecular Biotechnology and Microbiology, University of Debrecen,  
Egyetem tér 1, Debrecen, H-4032, Hungary

<sup>b</sup> Department of Inorganic and Analytical Chemistry, MTA-DE Homogeneous Catalysis and  
Reaction Mechanisms Research Group, University of Debrecen, Egyetem tér 1, Debrecen, H-  
4032 Hungary

<sup>c</sup> Department of Pathology, Kenézy University Hospital, University of Debrecen, 2-28 Bartók  
Béla Street, Debrecen, H-4031, Hungary

\* Corresponding author: e-mail: [kalmar.jozsef@science.unideb.hu](mailto:kalmar.jozsef@science.unideb.hu)

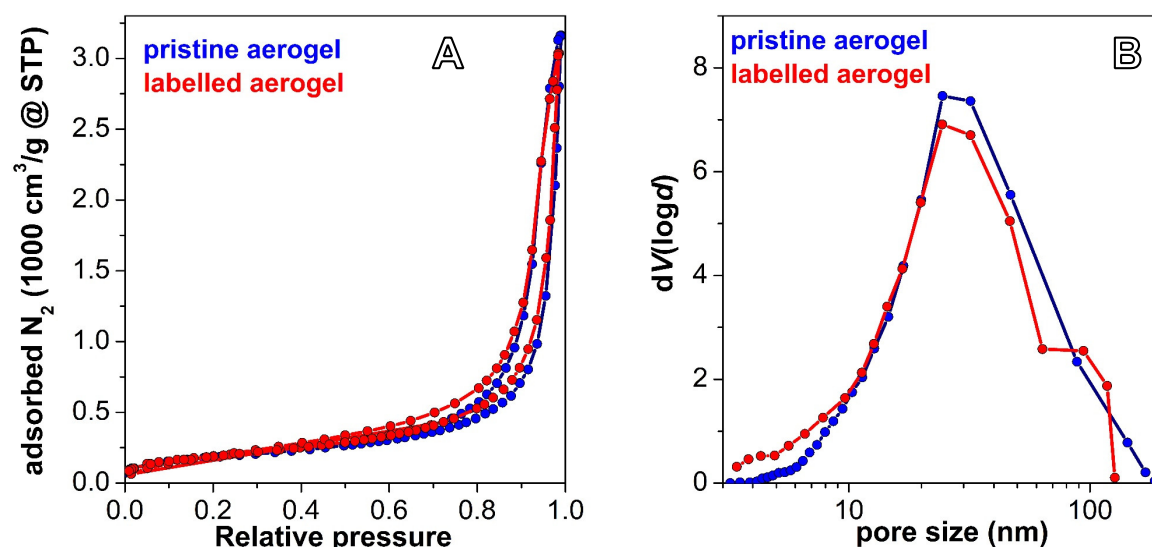

**Figure S1.** Nitrogen adsorption-desorption isotherms (A) and pore size distributions (B) calculated from the desorption curves by the BJH method.

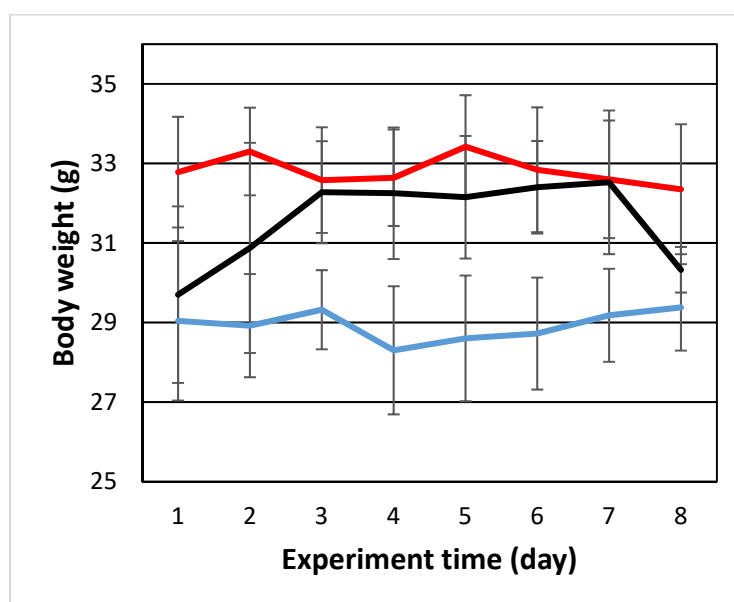

**Figure S2.** Average body weights of control (blue) and FSGM treated mice (red: “high dose”, black: “low dose”). The results are presented as mean values  $\pm$  the standard deviation (SD). The starting weight of the control animals was less than the weight of the treated mice due to their younger age.

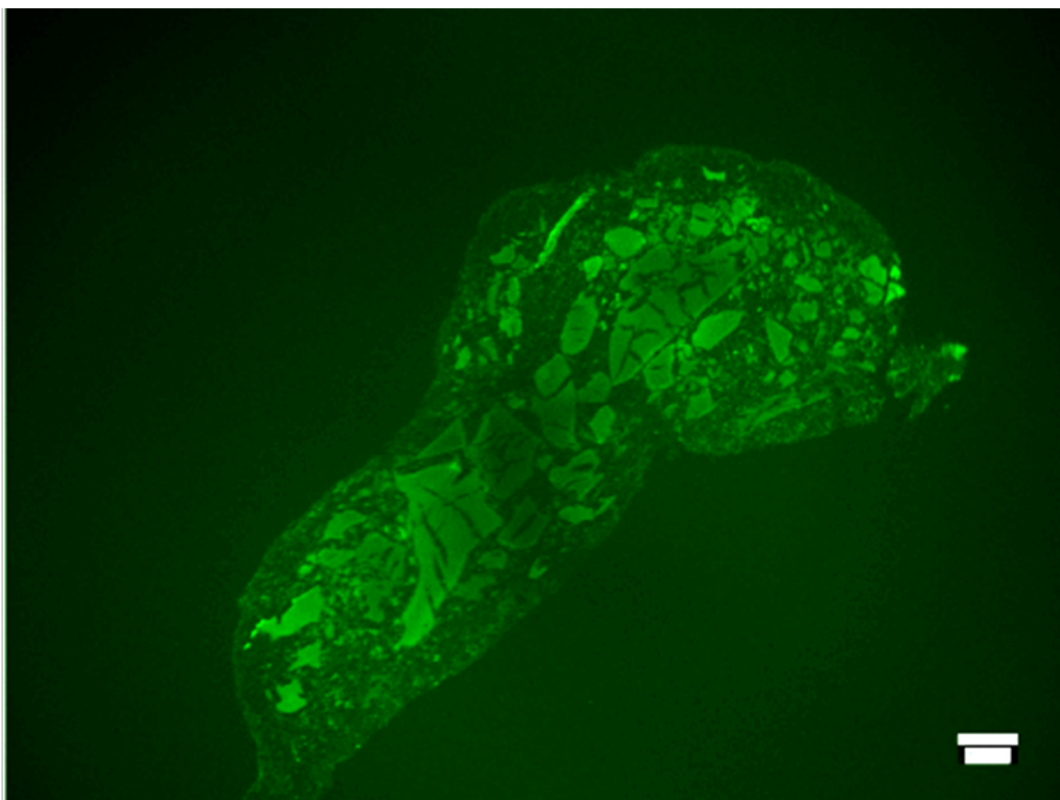

**Figure S3.** FSGM particle aggregation recovered from next to the intestine of C3H mouse. Fluorescent images were taken with FITC filter. Scale bar: 100  $\mu\text{m}$ .
